# Supplementary material for: FOVEA: a new program to standardize the measurement of foveal pit morphology
Source: PeerJ. 2016 Apr 11;4:e1785. doi: 10.7717/peerj.1785 (PMC4830241; doi:10.7717/peerj.1785)
Supplement: Data S1 [file peerj-04-1785-s001.xlsx]

## Sheet: Sheet1
species	foveal width	foveal depth	slope A_B	slope B_C	slope D_C	slope E_D	slope A_C	slope E_C
White-crowned Sparrow	446.005	146.381	0.198369	0.459831	0.817918	0.212509	0.3291	0.515213
White-crowned Sparrow	376.27	115.494	0.254775	1.52686	0.718908	0.367809	0.890818	0.543358
White-crowned Sparrow	587.454	107.898	0.3492	0.526611	0.685048	0.272463	0.437906	0.478756
House Sparrow	467.624	237.01	1.04579	1.00203	0.936453	0.704248	1.02391	0.82035
House Sparrow	694.649	187.321	0.251197	1.01472	1.11023	0.233508	0.632958	0.671869
House Sparrow	659.743	153.29	0.172864	0.724969	0.886707	0.306744	0.448916	0.596726
